# Supplementary material for: Remdesivir and GS-441524 Retain Antiviral Activity against Delta, Omicron, and Other Emergent SARS-CoV-2 Variants
Source: PubMed Central journal article supplement (PMC9211395; doi:10.1128/aac.00222-22), 2022-05-09
Supplement: aac.00222-22-s0001.pdf [file aac.00222-22-s0001.pdf]

1 **Supplemental Materials**

2

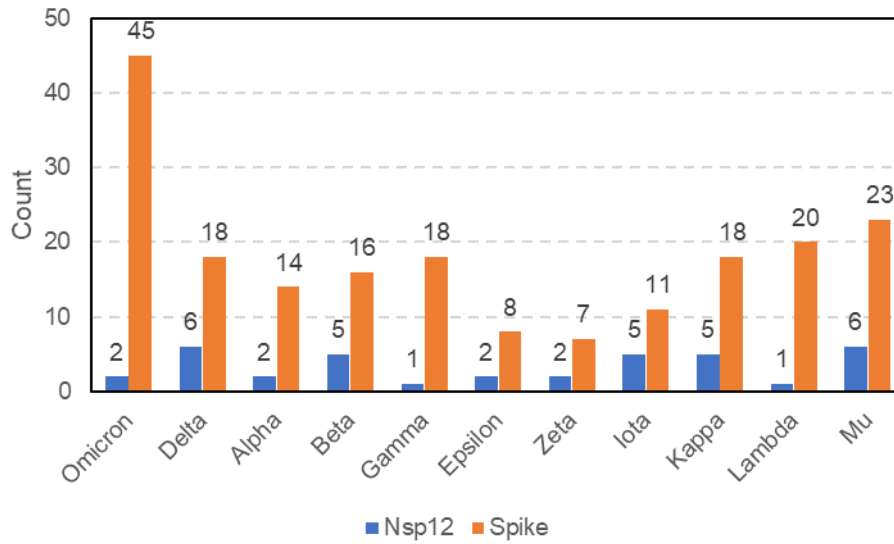

4 **Supplemental Figure 1. Amino acid substitutions in Nsp12 and Spike.** The total number of  
5 amino acid substitutions in Nsp12 compared to Spike from each variant of concern or variant of  
6 interest. Actual substitutions for each variant are found in Supplemental Tables 1 (Nsp12) and 2  
7 (Spike).

8

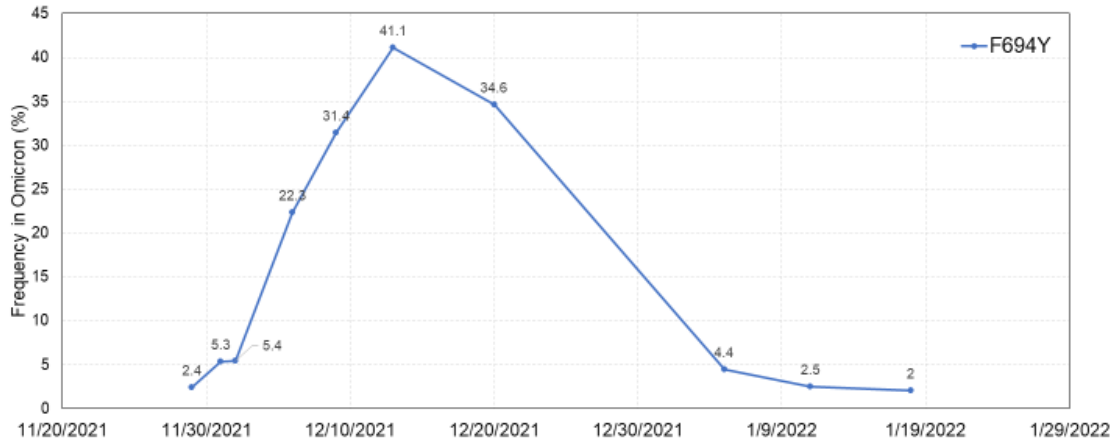

11 **Supplemental Figure 2. F694Y frequency in Omicron variant over time.** Omicron sequences  
 12 were obtained from GISAID at ten different timepoints. Frequency of F694Y in all omicron  
 13 sequences at each timepoint are plotted. The frequency among UK isolates is shown in the data  
 14 table below the plot.

15

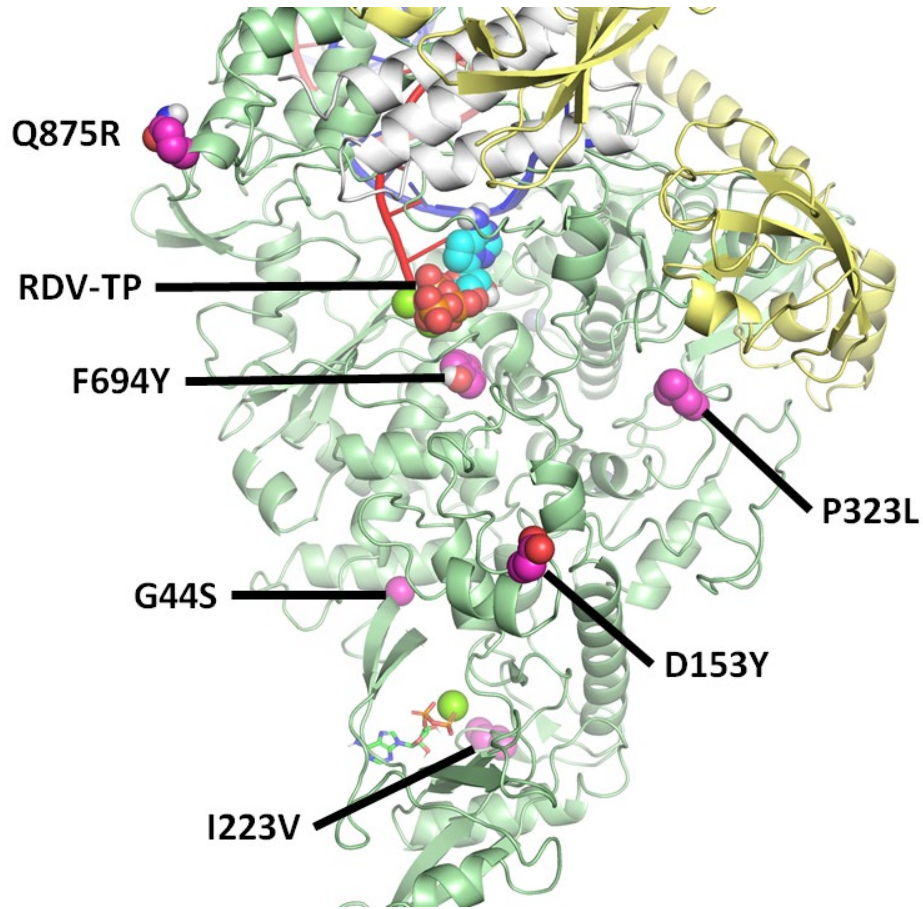

16

17 **Supplemental Figure 3. Location of Omicron Nsp12 amino acid substitutions with**  
18 **frequency >0.5%.** Amino acid substitutions identified in Table 2 are mapped onto the model of  
19 the polymerase complex with pre-incorporated RDV-TP. All substitutions occur on the surface  
20 of Nsp12, away from the active site, apart from F694Y. Nsp12 is shown in green, Nsp8 in  
21 yellow, Nsp7 in white, template RNA in blue, and primer RNA in red.

22

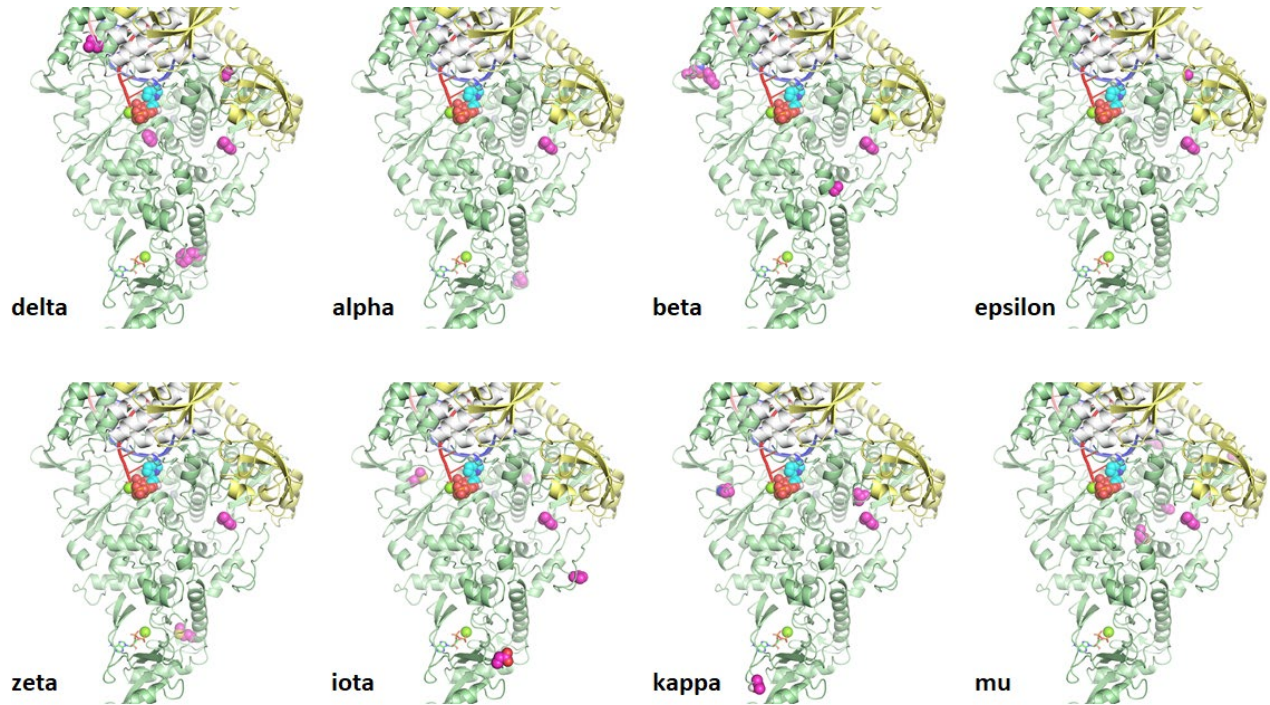

23

24 **Supplemental Figure 4. Location of variant Nsp12 amino acid substitutions with frequency**

25 **>1%.** Amino acid substitutions identified in Supplemental Table 1 are mapped onto the model of

26 the polymerase complex with pre-incorporated RDV-TP. Gamma and Lambda are not shown,

27 since substitutions are limited to P323L, while Omicron substitutions are shown in Supplemental

28 Fig. 3. With the exception of F694Y, seen in Delta, the substitutions are all remote from the

29 polymerase active site. Nsp12 is shown in green, Nsp8 in yellow, Nsp7 in white, template RNA

30 in blue, and primer RNA in red. Amino acid substitutions are shown in magenta.

31 **Supplemental Table 1. SARS-CoV-2 variant clinical isolates and sources**

| <b>Variant</b> | <b>Isolate</b>                                 | <b>Lineage</b> | <b>Source (Cat #)</b> | <b>GISAID ID</b> | <b>Depositor</b>                                   |
|----------------|------------------------------------------------|----------------|-----------------------|------------------|----------------------------------------------------|
|                | hCoV-19/USA-WA1/2020<br>(WA1)                  | A              | BEI (NR-52281)        | EPI_ISL_404895   | Center for<br>Disease Control<br>and Prevention    |
| Alpha          | hCoV-<br>19/England/204820464/2020             | B.1.1.7        | BEI (NR-54000)        | EPI_ISL_683466   | Bassam Hallis                                      |
| Beta           | hCoV-19/South<br>Africa/KRISP-<br>K005325/2020 | B.1.351        | BEI (NR-54009)        | EPI_ISL_678615   | Alex Sigal and<br>Tulio de Oliveira                |
| Gamma          | hCoV-19/Japan/TY7-<br>503/2021                 | P.1            | BEI (NR-54982)        | EPI_ISL_877769   | National<br>Institutes of<br>Infectious<br>Disease |
| Delta          | GNL-1205                                       | B.1.617.2      | Source: UTMB          |                  |                                                    |
| Epsilon        | GNL-354                                        | B.1.429        | Source: UTMB          |                  |                                                    |
| Zeta           | hCoV-<br>19/USA/CA/VRLC012/2021                | P.2            | BEI (NR-55439)        | EPI_ISL_1364506  | Andrew S.<br>Pekosz                                |
| Iota           | hCoV-19/USA/NY-NP-<br>DOH1/2021                | B.1.526        | BEI (NR-55359)        | EPI_ISL_1080761  | David D. Ho<br>(Columbia<br>University)            |
| Kappa          | hCoV-19/USA/CA-<br>Stanford-15_S02/2021        | B.1.617.1      | BEI (NR-55486)        | EPI_ISL_1675223  | Dr Mehul Suthar<br>and Dr.<br>Benjamin Pinsky      |
| Lambda         | hCoV-19/Peru/un-CDC-2-<br>4069945/2021         | C.37           | BEI (NR-55654)        | EPI_ISL_1591097  | Center for<br>Disease Control<br>and Prevention    |
| Omicron        | hCoV-19/USA/MD-<br>HP20874/2021                | B.1.1.529      | BEI (NR-56461)        | EPI_ISL_7160424  | Andrew S.<br>Pekosz                                |

32

33 **Supplemental Table 2. Amino acid substitutions of Nsp12 in VOC/VOI observed at**  
 34 **frequency  $\geq 1\%$**

| <b>SARS-CoV-2 Variant</b> | <b>SARS-CoV-2 Variant Sequences Analyzed (N, % of Total Sequences)</b> | <b>Nsp12 Substitution</b> | <b>Frequency of Substitution, % (N)</b> |
|---------------------------|------------------------------------------------------------------------|---------------------------|-----------------------------------------|
| Omicron                   | 392,056 (6.7%)                                                         | P323L                     | 99.5 (390,020)                          |
|                           |                                                                        | F694Y                     | 2.0 (7,822)                             |
| Delta                     | 4,059,836 (69.5%)                                                      | P323L                     | 99.4 (4,034,234)                        |
|                           |                                                                        | G671S                     | 97.8 (3,968,940)                        |
|                           |                                                                        | L838I                     | 6.8 (277,419)                           |
|                           |                                                                        | F192V                     | 5.8 (235,631)                           |
|                           |                                                                        | F694Y                     | 4.9 (197,489)                           |
|                           |                                                                        | R197Q                     | 1.2 (47,122)                            |
| Alpha                     | 1,158,351 (19.8%)                                                      | P323L                     | 99.3 (1,149,857)                        |
|                           |                                                                        | P227L                     | 14.2 (164,221)                          |
| Beta                      | 35,180 (0.60%)                                                         | P323L                     | 91.7 (37,661)                           |
|                           |                                                                        | L829F                     | 9.0 (3,712)                             |
|                           |                                                                        | P323H                     | 7.5 (3,075)                             |
|                           |                                                                        | Q822H                     | 5.4 (2,198)                             |
|                           |                                                                        | A176T                     | 2.3 (940)                               |
| Gamma                     | 120,614 (2.1%)                                                         | P323L                     | 99.3 (119,734)                          |
| Epsilon                   | 44,549 (0.76%)                                                         | P323L                     | 94.9 (42,274)                           |
|                           |                                                                        | G671V                     | 2.1 (937)                               |
| Zeta                      | 1,834 (0.03%)                                                          | P323L                     | 98.2 (1,801)                            |
|                           |                                                                        | M196L                     | 1.9 (34)                                |
| Iota                      | 20,923 (0.36%)                                                         | P323L                     | 99.5 (20,821)                           |
|                           |                                                                        | M601I                     | 2.3 (485)                               |
|                           |                                                                        | V257A                     | 2.1 (438)                               |
|                           |                                                                        | D62G                      | 1.2 (244)                               |
|                           |                                                                        | A529V                     | 1.2 (241)                               |

|        |               |       |              |
|--------|---------------|-------|--------------|
| Kappa  | 5,498 (0.09%) | P323L | 99.5 (5,472) |
|        |               | V675I | 7.8 (431)    |
|        |               | K478N | 7.1 (388)    |
|        |               | T26I  | 4.0(218)     |
|        |               | P809R | 1.6 (88)     |
| Lambda | 6,219 (0.11%) | P323L | 99.8 (6,209) |
| Mu     | 7,888 (0.14%) | P323L | 98.5 (7,771) |
|        |               | Y521C | 21.8 (1,722) |
|        |               | M629I | 9.6 (756)    |
|        |               | T344I | 2.3 (181)    |
|        |               | A656S | 1.6 (124)    |
|        |               | S364F | 1.4 (109)    |

35

36 **Supplemental Table 3. Amino acid substitutions of Spike in VOC/VOI observed at**  
 37 **frequency  $\geq 1\%$**

| SARS-CoV-2 Variant | SARS-CoV-2 Variant Sequences Analyzed, N (% of Total Sequences) | Spike Substitutions | Frequency of Substitution, % (N) |
|--------------------|-----------------------------------------------------------------|---------------------|----------------------------------|
| Omicron            | 392,056 (6.7)                                                   | D614G               | 99.6 (390,638)                   |
|                    |                                                                 | H655Y               | 99.5 (389,923)                   |
|                    |                                                                 | N679K               | 99.4 (389,751)                   |
|                    |                                                                 | P681H               | 99.4 (389,598)                   |
|                    |                                                                 | N969K               | 98.3 (385,175)                   |
|                    |                                                                 | Q954H               | 98.0 (384,342)                   |
|                    |                                                                 | T547K               | 97.8 (383,385)                   |
|                    |                                                                 | D796Y               | 97.1 (380,607)                   |
|                    |                                                                 | A67V                | 96.9 (379,804)                   |
|                    |                                                                 | L981F               | 96.6 (378,693)                   |
|                    |                                                                 | N856K               | 96.5 (378,369)                   |
|                    |                                                                 | T95I                | 96.0 (376,297)                   |
|                    |                                                                 | HV69_70.del         | 95.1 (372,722)                   |
|                    |                                                                 | G142D               | 95 (372,462)                     |
|                    |                                                                 | YVY144_145.del      | 93.6 (366,879)                   |
|                    |                                                                 | G339D               | 92.2 (361,471)                   |
|                    |                                                                 | Q493R               | 88.3 (346,211)                   |
|                    |                                                                 | T478K               | 88.0 (345,149)                   |
|                    |                                                                 | N501Y               | 87.7 (343,910)                   |
|                    |                                                                 | S477N               | 87.7 (343,796)                   |
|                    |                                                                 | E484A               | 87.5 (343,201)                   |
|                    |                                                                 | Q498R               | 87.4 (342,647)                   |
|                    |                                                                 | Y505H               | 87.3 (342,159)                   |
| G496S              | 86.0 (337,306)                                                  |                     |                                  |
| S375F              | 85.3 (334,245)                                                  |                     |                                  |
| S373P              | 85.2 (334,038)                                                  |                     |                                  |



|       |                  |               |                  |
|-------|------------------|---------------|------------------|
|       |                  | N211del       | 84.5 (331,246)   |
|       |                  | L212I         | 84.5 (331,183)   |
|       |                  | S371L         | 83.3 (326,673)   |
|       |                  | ins214EPE     | 79.7 (312,289)   |
|       |                  | N764K         | 73.7 (288,937)   |
|       |                  | N440K         | 41.8 (163,741)   |
|       |                  | G446S         | 41.5 (162,582)   |
|       |                  | K417N         | 38.6 (151,376)   |
|       |                  | R346K         | 23.6 (92,580)    |
|       |                  | A701V         | 13.9 (54,486)    |
|       |                  | I1081V        | 4.1 (15,944)     |
|       |                  | S371F         | 1.6 (6,166)      |
|       |                  | T19I          | 1.6 (6,106)      |
|       |                  | D405N         | 1.6 (6,076)      |
|       |                  | T376A         | 1.5 (6,044)      |
|       |                  | V213G         | 1.5 (6,004)      |
|       |                  | R408S         | 1.5 (5,968)      |
|       |                  | A27S          | 1.4 (5,305)      |
|       |                  | PPL24_26.del  | 1.4 (5,282)      |
| Delta | 4,059,836 (69.5) | D614G         | 99.7 (4,046,614) |
|       |                  | P681R         | 99.5 (4,038,886) |
|       |                  | T19R          | 98.5 (3,998,522) |
|       |                  | T478K         | 97.4 (3,955,352) |
|       |                  | L452R         | 97.2 (3,944,329) |
|       |                  | D950N         | 95.5 (3,876,829) |
|       |                  | FR157_158.del | 91.9 (3,728,796) |
|       |                  | R158del       | 91.6 (3,718,449) |
|       |                  | G142D         | 65.5 (2,660,026) |
|       |                  | T95I          | 38.5 (1,563,622) |
|       |                  | A222V         | 10.2 (412,176)   |

|       |                  |               |                  |
|-------|------------------|---------------|------------------|
|       |                  | Y145H         | 3.4 (137,276)    |
|       |                  | V1264L        | 2.5 (102,597)    |
|       |                  | S112L         | 1.8 (71,539)     |
|       |                  | L5F           | 1.4 (57,319)     |
|       |                  | V1104L        | 1.4 (56,592)     |
|       |                  | D950B         | 1.2 (50,256)     |
|       |                  | Q613H         | 1.2 (49,816)     |
| Alpha | 1,158,351 (19.8) | D614G         | 99.6 (1,153,400) |
|       |                  | A570D         | 99.5 (1,152,134) |
|       |                  | P681H         | 99.3 (1,149,903) |
|       |                  | T716I         | 99.0 (1,146,565) |
|       |                  | S982A         | 98.8 (1,143,902) |
|       |                  | D1118H        | 98.7 (1,143,499) |
|       |                  | N501Y         | 97.8 (1,132,631) |
|       |                  | HV69_70.del   | 94.8 (1,098,478) |
|       |                  | Y144del       | 93.9 (1,087,059) |
|       |                  | K1191N        | 3.4 (39,741)     |
|       |                  | L5F           | 3.4 (39,474)     |
|       |                  | S98F          | 1.8 (20,357)     |
|       |                  | W152R         | 1.5 (17,596)     |
|       |                  | D138H         | 1.1 (12,137)     |
| Beta  | 35,180 (0.60)    | D614G         | 99.5 (35,003)    |
|       |                  | A701V         | 99.1 (34,869)    |
|       |                  | D80A          | 93.9 (33,028)    |
|       |                  | K417N         | 92.6 (32,585)    |
|       |                  | D215G         | 92.5 (32,557)    |
|       |                  | N501Y         | 89.9 (31,628)    |
|       |                  | E484K         | 89.4 (31,436)    |
|       |                  | LAL242-244del | 83.5 (29,361)    |
|       |                  | L18F          | 44.1 (15,521)    |

|         |               |         |                |
|---------|---------------|---------|----------------|
|         |               | A27S    | 10.8 (3,786)   |
|         |               | T19I    | 2.4 (850)      |
|         |               | P384L   | 1.8 (644)      |
|         |               | L241del | 1.7 (586)      |
|         |               | A899S   | 1.6 (575)      |
|         |               | L5F     | 1.6 (558)      |
|         |               | A67V    | 1.1 (399)      |
| Gamma   | 120,614 (2.1) | D614G   | 99.5 (119,958) |
|         |               | H655Y   | 98.5 (118,832) |
|         |               | V1176F  | 97.0 (116,930) |
|         |               | T1027I  | 96.9 (116,868) |
|         |               | L18F    | 95.9 (115,714) |
|         |               | P26S    | 95.7 (115,423) |
|         |               | T20N    | 95.4 (115,087) |
|         |               | K417T   | 95.2 (114,812) |
|         |               | N501Y   | 95.1 (114,694) |
|         |               | E484K   | 94.8 (114,366) |
|         |               | D138Y   | 93.7 (112,995) |
|         |               | R190S   | 92.9 (112,060) |
|         |               | P681H   | 5.0 (6,063)    |
|         |               | A688V   | 2.6 (3,160)    |
|         |               | N679K   | 1.6 (1,884)    |
|         |               | S1252F  | 1.4 (1,660)    |
|         |               | Q675H   | 1.1 (1,342)    |
|         |               | H49Y    | 1.0 (1,254)    |
| Epsilon | 44,549 (0.76) | D614G   | 99.8 (44,472)  |
|         |               | L452R   | 97.4 (43,409)  |
|         |               | W152C   | 95.0 (42,311)  |
|         |               | S13I    | 84.0 (37,439)  |
|         |               | W258L   | 8.7 (3,871)    |

|       |               |        |               |
|-------|---------------|--------|---------------|
|       |               | P26S   | 5.7 (2,517)   |
|       |               | L5F    | 1.8 (819)     |
|       |               | S1252F | 1.5 (678)     |
| Zeta  | 1,834 (0.03)  | D614G  | 100.0 (1,833) |
|       |               | V1176F | 97.7 (1,791)  |
|       |               | E484K  | 94.7 (1,737)  |
|       |               | F565L  | 5.8 (106)     |
|       |               | L5F    | 2.4 (43)      |
|       |               | T859I  | 1.0 (19)      |
|       |               | A626S  | 1.0 (19)      |
| Iota  | 20,923 (0.36) | D614G  | 99.7 (20,863) |
|       |               | T95I   | 98.4 (20,582) |
|       |               | D253G  | 97.8 (20,471) |
|       |               | L5F    | 95.9 (20,073) |
|       |               | A701V  | 63.6 (13,313) |
|       |               | E484K  | 53.3 (11,152) |
|       |               | S477N  | 39.7 (8,314)  |
|       |               | Q957R  | 31.4 (6,570)  |
|       |               | L18F   | 3.5 (733)     |
|       |               | D1260N | 3.1 (657)     |
|       |               | A845S  | 1.8 (375)     |
| Kappa | 5,498 (0.09)  | D614G  | 99.8 (5,488)  |
|       |               | P681R  | 99.5 (5,470)  |
|       |               | E484Q  | 95.8 (5,266)  |
|       |               | L452R  | 95.7 (5,263)  |
|       |               | Q1071H | 72.3 (3,973)  |
|       |               | E154K  | 67.7 (3,721)  |
|       |               | T95I   | 44.2 (2,429)  |
|       |               | G142D  | 43.4 (2,387)  |
|       |               | H1101D | 32.9 (1,807)  |

|        |              |                     |              |
|--------|--------------|---------------------|--------------|
|        |              | V382L               | 8.3 (455)    |
|        |              | D1153Y              | 8.1 (444)    |
|        |              | Q218H               | 4 (221)      |
|        |              | V3G                 | 2.1 (113)    |
|        |              | H1101Y              | 1.6 (87)     |
|        |              | Y144del             | 1.5 (81)     |
|        |              | V1264L              | 1.3 (70)     |
|        |              | E1072K              | 1 (55)       |
|        |              | K1073R              | 1 (55)       |
| Lambda | 6,219 (0.11) | D614G               | 99.9 (6,213) |
|        |              | T859N               | 99.1 (6,160) |
|        |              | L452Q               | 98.2 (6,105) |
|        |              | F490S               | 97.5 (6,063) |
|        |              | G75V                | 94.4 (5,873) |
|        |              | T76I                | 94.4 (5,871) |
|        |              | D253N               | 78.4 (4,878) |
|        |              | RSYLTPG.246_252.del | 78.2 (4,863) |
|        |              | Q675H               | 8.6 (534)    |
|        |              | I714V               | 4.6 (283)    |
|        |              | HV69_70del          | 3.5 (216)    |
|        |              | T572I               | 2.8 (173)    |
|        |              | L5F                 | 2.2 (138)    |
|        |              | T63I                | 2.1 (130)    |
|        |              | G72E                | 1.5 (93)     |
|        |              | Q677H               | 1.5 (91)     |
|        |              | R21I                | 1.4 (88)     |
|        |              | A262S               | 1.4 (84)     |
|        |              | DS.253_254del       | 1.1 (66)     |
|        |              | T20I                | 1 (63)       |
| Mu     | 7,888 (0.14) | D614G               | 99.8 (7,875) |

|  |         |              |
|--|---------|--------------|
|  | P681H   | 99.6 (7,855) |
|  | R346K   | 99.2 (7,824) |
|  | T95I    | 96.2 (7,590) |
|  | N501Y   | 96.2 (7,589) |
|  | E484K   | 95.8 (7,553) |
|  | D950N   | 92.9 (7,324) |
|  | Y145N   | 84 (6,627)   |
|  | ins143T | 76.4 (6,026) |
|  | Y144S   | 68.3 (5,389) |
|  | E583D   | 5.3 (420)    |
|  | Y449N   | 5.3 (417)    |
|  | K417N   | 5.3 (415)    |
|  | D950B   | 4.8 (379)    |
|  | Y144T   | 4.8 (375)    |
|  | M1229I  | 3.4 (270)    |
|  | S939F   | 2.9 (230)    |
|  | ins144S | 2.5 (201)    |
|  | Y144del | 2.4 (193)    |
|  | Y144N   | 2.1 (165)    |
|  | T572I   | 1.9 (153)    |
|  | M1237I  | 1.7 (133)    |
|  | L5F     | 1.5 (121)    |

38

39 **Supplemental Table 4. Amino acid substitutions of Nsp7 in VOC/VOI observed at**  
40 **frequency  $\geq 1\%$**

| <b>Variants</b> | <b>Sequence Count<br/>(Count/Total sequence<br/>N=5,842,948)</b> | <b>Nsp7 substitutions with<br/>Frequency <math>\geq 1\%</math> in the<br/>variants</b> | <b>Frequency of<br/>Substitution, % (N)</b> |
|-----------------|------------------------------------------------------------------|----------------------------------------------------------------------------------------|---------------------------------------------|
| Omicron         | 392056 (6.7%)                                                    | -                                                                                      |                                             |
| Delta           | 4059836 (69.5%)                                                  | -                                                                                      |                                             |
| Alpha           | 1158351 (19.8%)                                                  | -                                                                                      |                                             |
| Beta            | 35180 (0.60%)                                                    | L56F                                                                                   | 2.6 (913)                                   |

|         |               |      |             |
|---------|---------------|------|-------------|
| Gamma   | 120614 (2.1%) | -    |             |
| Epsilon | 44549 (0.76%) | -    |             |
| Zeta    | 1834 (0.03%)  | L71F | 99.1 (1818) |
| Iota    | 20923 (0.36%) | -    |             |
| Kappa   | 5498 (0.09%)  | L71F | 2.4 (130)   |
| Lambda  | 6219 (0.11%)  | -    |             |
| Mu      | 7888 (0.14%)  | -    |             |

41

42 **Supplemental Table 5. Amino acid substitutions of Nsp8 in VOC/VOI observed at**  
43 **frequency  $\geq 1\%$**

| <b>Variants</b> | <b>Sequence Count<br/>(Count/Total sequence<br/>N=5,842,948)</b> | <b>Nsp8 substitutions with<br/>Frequency <math>\geq 1\%</math> in<br/>the variants</b> | <b>Frequency of<br/>Substitution, % (N)</b> |
|-----------------|------------------------------------------------------------------|----------------------------------------------------------------------------------------|---------------------------------------------|
| Omicron         | 392056 (6.7%)                                                    | -                                                                                      |                                             |
| Delta           | 4059836 (69.5%)                                                  | -                                                                                      |                                             |
| Alpha           | 1158351 (19.8%)                                                  | Q24R                                                                                   | 6.1 (70236)                                 |
|                 |                                                                  | T145I                                                                                  | 1.0 (11659)                                 |
| Beta            | 35180 (0.60%)                                                    | -                                                                                      |                                             |
| Gamma           | 120614 (2.1%)                                                    | -                                                                                      |                                             |
| Epsilon         | 44549 (0.76%)                                                    | -                                                                                      |                                             |
| Zeta            | 1834 (0.03%)                                                     | P133S                                                                                  | 5.2 (95)                                    |
| Iota            | 20923 (0.36%)                                                    | A14V                                                                                   | 1.2 (248)                                   |
| Kappa           | 5498 (0.09%)                                                     | -                                                                                      |                                             |
| Lambda          | 6219 (0.11%)                                                     | -                                                                                      |                                             |
| Mu              | 7888 (0.14%)                                                     | -                                                                                      |                                             |

44

45

46
